# Supplementary material for: An efficient method for generating property-energy consistent basis sets. New pecJ-n (n = 1, 2) basis sets for high-quality calculations of indirect nuclear spin–spin coupling constants involving 1H, 13C, 15N, and 19F nuclei
Source: Royal Society of Chemistry journal article supplement (doi:10.1039/d1cp01984h), 2021-01-01
Supplement: d1cp01984h1.pdf [file d1cp01984h1.pdf]

An efficient method for generating property-energy consistent basis sets. New pecJ-*n* (*n* = 1, 2) basis sets for high-quality calculations of indirect nuclear spin-spin coupling constants involving <sup>1</sup>H, <sup>13</sup>C, <sup>15</sup>N, and <sup>19</sup>F nuclei

Yuriy Yu. Rusakov, Irina L. Rusakova

## Supplementary Information

Basis sets are given CFOUR format

H:pecJ-1

Property-energy consistent basis set

2

0 1

5 2

7 2

5.07308E+03 2.16644E+02 2.50008E+01 5.00205E+00 1.29556E+00  
4.00307E-01 1.33227E-01

1.6152E-05 0.00000000 0.00000000 0.00000000 0.00000000  
5.6257E-04 0.00000000 0.00000000 0.00000000 0.00000000  
6.0071E-03 0.00000000 0.00000000 0.00000000 0.00000000  
0.00000000 1.00000000 0.00000000 0.00000000 0.00000000  
0.00000000 0.00000000 1.00000000 0.00000000 0.00000000  
0.00000000 0.00000000 0.00000000 1.00000000 0.00000000  
0.00000000 0.00000000 0.00000000 0.00000000 1.00000000

1.48544E+00 4.06750E-01

1.00000000 0.00000000  
0.00000000 1.00000000

C:pecJ-1

Property-energy consistent basis set

3

0 1 2

8 3 2

10 5 2

3.551632E+04 5.744652E+03 9.954157E+02 2.315943E+02 6.620654E+01  
2.157261E+01 7.648720E+00 2.844272E+00 6.482868E-01 2.179306E-01

7.5298E-05 0.00000000 0.00000000 0.00000000 0.00000000 0.00000000 0.00000000  
0.00000000  
6.8542E-04 0.00000000 0.00000000 0.00000000 0.00000000 0.00000000 0.00000000  
0.00000000  
5.2333E-03 0.00000000 0.00000000 0.00000000 0.00000000 0.00000000 0.00000000  
0.00000000  
0.00000000 1.00000000 0.00000000 0.00000000 0.00000000 0.00000000 0.00000000  
0.00000000  
0.00000000 0.00000000 1.00000000 0.00000000 0.00000000 0.00000000 0.00000000

0.00000000  
0.00000000 0.00000000 0.00000000 1.00000000 0.00000000 0.00000000 0.00000000  
0.00000000  
0.00000000 0.00000000 0.00000000 0.00000000 1.00000000 0.00000000 0.00000000  
0.00000000  
0.00000000 0.00000000 0.00000000 0.00000000 0.00000000 1.00000000 0.00000000  
0.00000000  
0.00000000 0.00000000 0.00000000 0.00000000 0.00000000 0.00000000 1.00000000  
0.00000000  
0.00000000 0.00000000 0.00000000 0.00000000 0.00000000 0.00000000 0.00000000  
1.00000000

3.053233E+01 6.903835E+00 1.882246E+00 5.969291E-01 1.734469E-01

4.2186E-03 0.00000000 0.00000000  
3.2808E-02 0.00000000 0.00000000  
1.1902E-01 0.00000000 0.00000000  
0.00000000 1.00000000 0.00000000  
0.00000000 0.00000000 1.00000000

1.234913E+00 3.853405E-01

1.00000000 0.00000000  
0.00000000 1.00000000

N:pecJ-1

Property-energy consistent basis set

3  
0 1 2  
8 3 2  
10 5 2

1.649023E+05 9.215658E+03 1.455967E+03 3.238329E+02 8.920075E+01  
2.841262E+01 1.001470E+01 3.764414E+00 7.224090E-01 2.026552E-01

2.8965E-05 0.00000000 0.00000000 0.00000000 0.00000000 0.00000000 0.00000000  
0.00000000  
6.4303E-04 0.00000000 0.00000000 0.00000000 0.00000000 0.00000000 0.00000000  
0.00000000  
4.9523E-03 0.00000000 0.00000000 0.00000000 0.00000000 0.00000000 0.00000000  
0.00000000  
0.00000000 1.00000000 0.00000000 0.00000000 0.00000000 0.00000000 0.00000000  
0.00000000  
0.00000000 0.00000000 1.00000000 0.00000000 0.00000000 0.00000000 0.00000000  
0.00000000  
0.00000000 0.00000000 0.00000000 1.00000000 0.00000000 0.00000000 0.00000000  
0.00000000  
0.00000000 0.00000000 0.00000000 0.00000000 1.00000000 0.00000000 0.00000000  
0.00000000  
0.00000000 0.00000000 0.00000000 0.00000000 0.00000000 1.00000000 0.00000000  
0.00000000  
0.00000000 0.00000000 0.00000000 0.00000000 0.00000000 0.00000000 1.00000000  
0.00000000  
0.00000000 0.00000000 0.00000000 0.00000000 0.00000000 0.00000000 0.00000000  
1.00000000

3.123160E+01 6.893201E+00 1.978571E+00 6.571405E-01 1.946419E-01

7.8950E-03 0.00000000 0.00000000  
5.5666E-02 0.00000000 0.00000000  
1.6792E-01 0.00000000 0.00000000  
0.00000000 1.00000000 0.00000000  
0.00000000 0.00000000 1.00000000

1.411561E+00 3.724804E-01

1.00000000 0.00000000  
0.00000000 1.00000000

F:pecl-1  
Property-energy consistent basis set

3  
0 1 2  
8 3 2  
10 5 2

2.282510E+05 1.395200E+04 2.238199E+03 5.097673E+02 1.430299E+02  
4.604822E+01 1.633767E+01 6.221429E+00 1.267895E+00 3.612004E-01

3.5113E-05 0.00000000 0.00000000 0.00000000 0.00000000 0.00000000 0.00000000  
0.00000000  
7.1935E-04 0.00000000 0.00000000 0.00000000 0.00000000 0.00000000 0.00000000  
0.00000000  
5.3999E-03 0.00000000 0.00000000 0.00000000 0.00000000 0.00000000 0.00000000  
0.00000000  
0.00000000 1.00000000 0.00000000 0.00000000 0.00000000 0.00000000 0.00000000  
0.00000000  
0.00000000 0.00000000 1.00000000 0.00000000 0.00000000 0.00000000 0.00000000  
0.00000000  
0.00000000 0.00000000 0.00000000 1.00000000 0.00000000 0.00000000 0.00000000  
0.00000000  
0.00000000 0.00000000 0.00000000 0.00000000 1.00000000 0.00000000 0.00000000  
0.00000000  
0.00000000 0.00000000 0.00000000 0.00000000 0.00000000 1.00000000 0.00000000  
0.00000000  
0.00000000 0.00000000 0.00000000 0.00000000 0.00000000 0.00000000 1.00000000  
0.00000000  
0.00000000 0.00000000 0.00000000 0.00000000 0.00000000 0.00000000 0.00000000  
1.00000000

9.142507E+01 1.727983E+01 4.618007E+00 1.355099E+00 3.034276E-01

5.5622E-03 0.00000000 0.00000000  
5.4380E-02 0.00000000 0.00000000  
2.1629E-01 0.00000000 0.00000000  
0.00000000 1.00000000 0.00000000  
0.00000000 0.00000000 1.00000000

2.207200E+00 4.610628E-01

1.00000000 0.00000000  
0.00000000 1.00000000

H:pecl-2  
Property-energy consistent basis set

3  
0 1 2  
6 3 1  
8 3 1

3.26942E+04 3.09626E+03 1.76078E+02 2.25414E+01 4.68174E+00  
1.25964E+00 3.88875E-01 1.26668E-01

6.8514E-07 0.00000000 0.00000000 0.00000000 0.00000000 0.00000000  
2.6416E-05 0.00000000 0.00000000 0.00000000 0.00000000 0.00000000  
6.8682E-04 0.00000000 0.00000000 0.00000000 0.00000000 0.00000000  
0.00000000 1.00000000 0.00000000 0.00000000 0.00000000 0.00000000  
0.00000000 0.00000000 1.00000000 0.00000000 0.00000000 0.00000000  
0.00000000 0.00000000 0.00000000 1.00000000 0.00000000 0.00000000  
0.00000000 0.00000000 0.00000000 0.00000000 1.00000000 0.00000000  
0.00000000 0.00000000 0.00000000 0.00000000 0.00000000 1.00000000

2.35117E+00 7.73294E-01 2.79310E-01

1.00000000 0.00000000 0.00000000  
0.00000000 1.00000000 0.00000000  
0.00000000 0.00000000 1.00000000

1.07027E+00

1.00000000

C:pecl-2

Property-energy consistent basis set

4  
0 1 2 3  
9 4 3 1  
11 6 3 1

1.620383E+05 8.803354E+03 1.333357E+03 3.008000E+02 8.511667E+01  
2.752030E+01 9.731687E+00 3.570774E+00 8.102360E-01 3.593953E-01  
1.356139E-01

2.0172E-05 0.00000000 0.00000000 0.00000000 0.00000000 0.00000000 0.00000000  
0.00000000 0.00000000  
4.7447E-04 0.00000000 0.00000000 0.00000000 0.00000000 0.00000000 0.00000000  
0.00000000 0.00000000  
3.7131E-03 0.00000000 0.00000000 0.00000000 0.00000000 0.00000000 0.00000000  
0.00000000 0.00000000  
0.00000000 1.00000000 0.00000000 0.00000000 0.00000000 0.00000000 0.00000000  
0.00000000 0.00000000  
0.00000000 0.00000000 1.00000000 0.00000000 0.00000000 0.00000000 0.00000000  
0.00000000 0.00000000  
0.00000000 0.00000000 0.00000000 1.00000000 0.00000000 0.00000000 0.00000000  
0.00000000 0.00000000  
0.00000000 0.00000000 0.00000000 0.00000000 1.00000000 0.00000000 0.00000000  
0.00000000 0.00000000  
0.00000000 0.00000000 0.00000000 0.00000000 0.00000000 0.00000000 1.00000000  
0.00000000 0.00000000  
0.00000000 0.00000000 0.00000000 0.00000000 0.00000000 0.00000000 0.00000000  
1.00000000 0.00000000  
0.00000000 0.00000000 0.00000000 0.00000000 0.00000000 0.00000000 0.00000000  
0.00000000 1.00000000

9.495948E+01 1.778687E+01 4.534333E+00 1.336460E+00 4.353544E-01  
1.348775E-01

7.9297E-04 0.00000000 0.00000000 0.00000000  
8.7271E-03 0.00000000 0.00000000 0.00000000  
5.0608E-02 0.00000000 0.00000000 0.00000000  
0.00000000 1.00000000 0.00000000 0.00000000

0.00000000 0.00000000 1.00000000 0.00000000  
0.00000000 0.00000000 0.00000000 1.00000000

6.136738E+00 1.157001E+00 3.542131E-01

1.00000000 0.00000000 0.00000000  
0.00000000 1.00000000 0.00000000  
0.00000000 0.00000000 1.00000000

7.838496E-01

1.00000000

N:pecJ-2

Property-energy consistent basis set

4

0 1 2 3  
9 4 3 1  
11 6 3 1

2.079517E+05 1.292159E+04 1.817985E+03 4.082074E+02 1.167577E+02  
3.805405E+01 1.337707E+01 4.904271E+00 1.419406E+00 5.160150E-01  
1.537757E-01

2.0018E-05 0.00000000 0.00000000 0.00000000 0.00000000 0.00000000 0.00000000  
0.00000000 0.00000000  
4.4894E-04 0.00000000 0.00000000 0.00000000 0.00000000 0.00000000 0.00000000  
0.00000000 0.00000000  
3.8478E-03 0.00000000 0.00000000 0.00000000 0.00000000 0.00000000 0.00000000  
0.00000000 0.00000000  
0.00000000 1.00000000 0.00000000 0.00000000 0.00000000 0.00000000 0.00000000  
0.00000000 0.00000000  
0.00000000 0.00000000 1.00000000 0.00000000 0.00000000 0.00000000 0.00000000  
0.00000000 0.00000000  
0.00000000 0.00000000 0.00000000 1.00000000 0.00000000 0.00000000 0.00000000  
0.00000000 0.00000000  
0.00000000 0.00000000 0.00000000 0.00000000 0.00000000 1.00000000 0.00000000  
0.00000000 0.00000000  
0.00000000 0.00000000 0.00000000 0.00000000 0.00000000 0.00000000 0.00000000  
1.00000000 0.00000000  
0.00000000 0.00000000 0.00000000 0.00000000 0.00000000 0.00000000 0.00000000  
0.00000000 1.00000000

5.465743E+01 1.370955E+01 4.095889E+00 1.373762E+00 4.870015E-01  
1.595081E-01

3.0587E-03 0.00000000 0.00000000 0.00000000  
2.0245E-02 0.00000000 0.00000000 0.00000000  
8.5787E-02 0.00000000 0.00000000 0.00000000  
0.00000000 1.00000000 0.00000000 0.00000000  
0.00000000 0.00000000 1.00000000 0.00000000  
0.00000000 0.00000000 0.00000000 1.00000000

4.573625E+00 1.031398E+00 2.690828E-01

1.00000000 0.00000000 0.00000000  
0.00000000 1.00000000 0.00000000  
0.00000000 0.00000000 1.00000000

1.051532E+00

1.00000000

F:pecJ-2

Property-energy consistent basis set

4

0 1 2 3  
9 4 3 1  
11 6 3 1

3.22435E+05 1.95000E+04 2.92300E+03 6.64500E+02 1.87500E+02  
6.06200E+01 2.14200E+01 7.95000E+00 2.25700E+00 8.81500E-01  
3.04100E-01

2.2532E-05 0.00000000 0.00000000 0.00000000 0.00000000 0.00000000 0.00000000  
0.00000000 0.00000000  
4.9256E-04 0.00000000 0.00000000 0.00000000 0.00000000 0.00000000 0.00000000  
0.00000000 0.00000000  
3.9372E-03 0.00000000 0.00000000 0.00000000 0.00000000 0.00000000 0.00000000  
0.00000000 0.00000000  
0.00000000 1.00000000 0.00000000 0.00000000 0.00000000 0.00000000 0.00000000  
0.00000000 0.00000000  
0.00000000 0.00000000 1.00000000 0.00000000 0.00000000 0.00000000 0.00000000  
0.00000000 0.00000000  
0.00000000 0.00000000 0.00000000 1.00000000 0.00000000 0.00000000 0.00000000  
0.00000000 0.00000000  
0.00000000 0.00000000 0.00000000 0.00000000 0.00000000 1.00000000 0.00000000  
0.00000000 0.00000000  
0.00000000 0.00000000 0.00000000 0.00000000 0.00000000 0.00000000 1.00000000  
0.00000000 0.00000000  
0.00000000 0.00000000 0.00000000 0.00000000 0.00000000 0.00000000 0.00000000  
1.00000000 0.00000000  
0.00000000 0.00000000 0.00000000 0.00000000 0.00000000 0.00000000 0.00000000  
0.00000000 1.00000000

2.84686E+02 4.38800E+01 9.92600E+00 2.93000E+00 9.13200E-01  
2.67200E-01

9.2165E-04 0.00000000 0.00000000 0.00000000  
1.5560E-02 0.00000000 0.00000000 0.00000000  
1.0143E-01 0.00000000 0.00000000 0.00000000  
0.00000000 1.00000000 0.00000000 0.00000000  
0.00000000 0.00000000 1.00000000 0.00000000  
0.00000000 0.00000000 0.00000000 1.00000000

4.10694E+00 1.19313E+00 1.98893E-01

1.00000000 0.00000000 0.00000000  
0.00000000 1.00000000 0.00000000  
0.00000000 0.00000000 1.00000000

1.89198E+00

1.00000000

**Table S1.** The SSCCs (in Hz) calculated at the CCSD level ( $J_{\text{CCSD}}$ ) with taking into account solvent ( $\Delta_{\text{solv}}$ ) and vibrational ( $\Delta_{\text{vib}}$ ) corrections using the pecJ- $n$  ( $n = 1, 2$ ), ccJ-pVXZ ( $X=D, T$ ), and pcJ- $n$  ( $n = 1, 2$ ) basis sets.

| Molecule                       | SSCC                | Basis set | $N_{\text{bas}}$ | $J_{\text{CCSD}}$ | $\Delta_{\text{vib}}$ | $J_{\text{tot}}$ |
|--------------------------------|---------------------|-----------|------------------|-------------------|-----------------------|------------------|
| CH <sub>3</sub> CHO            | <sup>2</sup> J(H,H) | pecJ-1    | 112              | -16.4             | -0.6                  | -17.0            |
|                                |                     | pecJ-2    | 196              | -15.9             |                       | -16.5            |
|                                |                     | ccJ-pVDZ  | 104              | -16.5             |                       | -17.1            |
|                                |                     | ccJ-pVTZ  | 208              | -15.8             |                       | -16.4            |
|                                |                     | pcJ-1     | 108              | -17.0             |                       | -17.6            |
|                                |                     | pcJ-2     | 228              | -16.0             |                       | -16.6            |
| CF <sub>4</sub>                | <sup>2</sup> J(F,F) | pecJ-1    | 135              | 48.0              | -4.9                  | 43.1             |
|                                |                     | pecJ-2    | 215              | 34.9              |                       | 30.0             |
|                                |                     | ccJ-pVDZ  | 125              | 40.0              |                       | 35.1             |
|                                |                     | ccJ-pVTZ  | 205              | 40.8              |                       | 35.9             |
|                                |                     | pcJ-1     | 135              | 55.9              |                       | 51.0             |
|                                |                     | pcJ-2     | 255              | 39.3              |                       | 34.4             |
| CH <sub>2</sub> F <sub>2</sub> | <sup>2</sup> J(F,F) | pecJ-1    | 103              | 354.8             | 5.9                   | 360.7            |
|                                |                     | pecJ-2    | 169              | 332.3             |                       | 338.2            |
|                                |                     | ccJ-pVDZ  | 95               | 355.7             |                       | 361.6            |
|                                |                     | ccJ-pVTZ  | 171              | 344.9             |                       | 350.8            |
|                                |                     | pcJ-1     | 101              | 364.2             |                       | 370.1            |
|                                |                     | pcJ-2     | 201              | 334.2             |                       | 340.1            |
|                                | <sup>2</sup> J(H,H) | pecJ-1    | 103              | 0.0               | 0.7                   | 0.7              |
|                                |                     | pecJ-2    | 169              | 1.4               |                       | 2.1              |
|                                |                     | ccJ-pVDZ  | 95               | 0.7               |                       | 1.4              |
|                                |                     | ccJ-pVTZ  | 171              | 1.7               |                       | 2.4              |
|                                |                     | pcJ-1     | 101              | 0.4               |                       | 1.1              |
|                                |                     | pcJ-2     | 201              | 1.5               |                       | 2.2              |
| CH <sub>3</sub> F              | <sup>1</sup> J(C,H) | pecJ-1    | 87               | 139.3             | 3.9                   | 143.2            |
|                                |                     | pecJ-2    | 146              | 140.2             |                       | 144.1            |
|                                |                     | ccJ-pVDZ  | 80               | 140.5             |                       | 144.4            |
|                                |                     | ccJ-pVTZ  | 154              | 140.6             |                       | 144.5            |
|                                |                     | pcJ-1     | 84               | 141.4             |                       | 145.3            |
|                                |                     | pcJ-2     | 174              | 140.7             |                       | 144.6            |
|                                | <sup>2</sup> J(F,H) | pecJ-1    | 87               | 46.4              | -1.5                  | 44.9             |
|                                |                     | pecJ-2    | 146              | 48.0              |                       | 46.5             |
|                                |                     | ccJ-pVDZ  | 80               | 48.7              |                       | 47.2             |
|                                |                     | ccJ-pVTZ  | 154              | 48.7              |                       | 47.2             |
|                                |                     | pcJ-1     | 84               | 49.2              |                       | 47.7             |
|                                |                     | pcJ-2     | 174              | 47.8              |                       | 46.3             |
|                                | <sup>2</sup> J(H,H) | pecJ-1    | 87               | -10.9             | -0.2                  | -11.1            |
|                                |                     | pecJ-2    | 146              | -10.1             |                       | -10.3            |
|                                |                     | ccJ-pVDZ  | 80               | -10.6             |                       | -10.8            |
|                                |                     | ccJ-pVTZ  | 154              | -9.9              |                       | -10.1            |
|                                |                     | pcJ-1     | 84               | -10.9             |                       | -11.1            |
|                                |                     | pcJ-2     | 174              | -10.2             |                       | -10.4            |

|                                 |                       |          |      |       |      |       |
|---------------------------------|-----------------------|----------|------|-------|------|-------|
| NH <sub>3</sub>                 | <sup>2</sup> J(H,H)   | pecJ-1   | 60   | -12.3 | 0.7  | -11.6 |
|                                 |                       | pecJ-2   | 103  | -10.9 |      | -10.2 |
|                                 |                       | ccJ-pVDZ | 55   | -12.2 |      | -11.5 |
|                                 |                       | ccJ-pVTZ | 113  | -10.6 |      | -9.9  |
|                                 |                       | pcJ-1    | 57   | -12.3 |      | -11.6 |
|                                 |                       | pcJ-2    | 123  | -10.7 |      | -10.0 |
| CH <sub>3</sub> CN              | <sup>2</sup> J(C,N)   | pecJ-1   | 114  | 2.5   | 0.2  | 2.7   |
|                                 |                       | pecJ-2   | 189  | 2.7   |      | 2.9   |
|                                 |                       | ccJ-pVDZ | 105  | 2.6   |      | 2.8   |
|                                 |                       | ccJ-pVTZ | 195  | 2.7   |      | 2.9   |
|                                 |                       | pcJ-1    | 111  | 2.6   |      | 2.8   |
|                                 |                       | pcJ-2    | 225  | 2.7   |      | 2.9   |
|                                 | <sup>2</sup> J(H,H)   | pecJ-1   | 114  | -16.8 | -0.7 | -17.5 |
|                                 |                       | pecJ-2   | 189  | -16.3 |      | -17.0 |
|                                 |                       | ccJ-pVDZ | 105  | -17.0 |      | -17.7 |
|                                 |                       | ccJ-pVTZ | 195  | -16.2 |      | -16.9 |
|                                 |                       | pcJ-1    | 111  | -17.5 |      | -18.2 |
|                                 |                       | pcJ-2    | 225  | -16.4 |      | -17.1 |
| CH <sub>3</sub> NH <sub>2</sub> | <sup>1</sup> J(C,H)   | pecJ-1   | 109  | 124.6 | 4.6  | 129.2 |
|                                 |                       | pecJ-2   | 186  | 126.0 |      | 130.6 |
|                                 |                       | ccJ-pVDZ | 100  | 126.3 |      | 130.9 |
|                                 |                       | ccJ-pVTZ | 202  | 126.2 |      | 130.8 |
|                                 |                       | pcJ-1    | 104  | 126.9 |      | 131.5 |
|                                 |                       | pcJ-2    | 222  | 126.2 |      | 130.8 |
|                                 | <sup>2</sup> J(H-N-H) | pecJ-1   | 109  | -11.6 | 0.5  | -11.1 |
|                                 |                       | pecJ-2   | 186  | -10.3 |      | -9.8  |
|                                 |                       | ccJ-pVDZ | 100  | -11.4 |      | -10.9 |
|                                 |                       | ccJ-pVTZ | 202  | -10.0 |      | -9.5  |
|                                 |                       | pcJ-1    | 104  | -11.5 |      | -11.0 |
|                                 |                       | pcJ-2    | 222  | -10.2 |      | -9.7  |
|                                 | <sup>2</sup> J(H-C-H) | pecJ-1   | 109  | -13.5 | -0.7 | -14.2 |
|                                 |                       | pecJ-2   | 186  | -13.0 |      | -13.7 |
|                                 |                       | ccJ-pVDZ | 100  | -13.5 |      | -14.2 |
|                                 |                       | ccJ-pVTZ | 202  | -12.8 |      | -13.5 |
|                                 |                       | pcJ-1    | 104  | -14.0 |      | -14.7 |
|                                 |                       | pcJ-2    | 222  | -13.0 |      | -13.7 |
|                                 | <sup>2</sup> J(H-N-C) | pecJ-1   | 109  | -3.9  | -0.4 | -4.3  |
|                                 |                       | pecJ-2   | 186  | -3.4  |      | -3.8  |
|                                 |                       | ccJ-pVDZ | 100  | -4.0  |      | -4.4  |
|                                 |                       | ccJ-pVTZ | 202  | -3.4  |      | -3.8  |
|                                 |                       | pcJ-1    | 104  | -3.9  |      | -4.3  |
|                                 |                       | pcJ-2    | 222  | -3.4  |      | -3.8  |
| <sup>2</sup> J(H-C-N)           | pecJ-1                | 109      | -0.7 | 0.0   | -0.7 |       |
|                                 | pecJ-2                | 186      | -0.8 |       | -0.8 |       |
|                                 | ccJ-pVDZ              | 100      | -0.8 |       | -0.8 |       |
|                                 | ccJ-pVTZ              | 202      | -0.9 |       | -0.9 |       |
|                                 | pcJ-1                 | 104      | -0.3 |       | -0.3 |       |
|                                 |                       |          |      |       |      |       |



|  |                     |          |     |      |     |      |
|--|---------------------|----------|-----|------|-----|------|
|  |                     | pcJ-2    | 222 | -0.8 |     | -0.8 |
|  | ${}^3J(\text{H,H})$ | pecJ-1   | 109 | 6.5  | 0.4 | 6.9  |
|  |                     | pecJ-2   | 186 | 6.6  |     | 7.0  |
|  |                     | ccJ-pVDZ | 100 | 6.4  |     | 6.8  |
|  |                     | ccJ-pVTZ | 202 | 6.6  |     | 7.0  |
|  |                     | pcJ-1    | 104 | 6.5  |     | 6.9  |
|  |                     | pcJ-2    | 222 | 6.6  |     | 7.0  |

## Equilibrium geometries

H2 CCSD[T]/aug-cc-pV5Z geometry:

H 0.000000 0.000000 0.000000  
H 0.000000 0.000000 0.741608

C2H2 CCSD[T]/aug-cc-pV5Z geometry:

C 0.000000 0.000000 0.000000  
C 0.000000 0.000000 1.201932  
H 0.000000 0.000000 -1.059175  
H 0.000000 0.000000 2.261107

N2 CCSD[T]/aug-cc-pVQZ geometry:

N 0.000000 0.000000 0.000000  
N 0.000000 0.000000 1.098191

F2 CCSD[T]/aug-cc-pVQZ geometry:

F 0.000000 0.000000 0.000000  
F 0.000000 0.000000 1.410220

CH4 CCSD[T]/aug-cc-pV5Z geometry:

C 0.000000 0.000000 0.000000  
H 0.000000 0.000000 1.084304  
H 1.022292 0.000000 -0.361435  
H -0.511146 -0.885331 -0.361435  
H -0.511146 0.885331 -0.361435

NH3 CCSD[T]/aug-cc-pV5Z geometry:

N 0.000000 0.000000 0.000000  
H 0.000000 0.000000 1.009374  
H 0.966374 0.000000 -0.291472  
H -0.392349 -0.883148 -0.291459

HF CCSD[T]/aug-cc-pV5Z geometry:

|   |          |          |          |
|---|----------|----------|----------|
| H | 0.000000 | 0.000000 | 0.000000 |
| F | 0.000000 | 0.000000 | 0.916093 |

CH3NH2 CCSD[T]/aug-cc-pVQZ geometry:

|   |           |           |           |
|---|-----------|-----------|-----------|
| C | -0.050248 | -0.704349 | 0.000000  |
| N | -0.050248 | 0.756384  | -0.000000 |
| H | -0.587350 | -1.059747 | -0.876853 |
| H | 0.942667  | -1.163461 | 0.000000  |
| H | -0.587350 | -1.059747 | 0.876853  |
| H | 0.443119  | 1.107253  | 0.808804  |
| H | 0.443119  | 1.107253  | -0.808804 |

CH3F CCSD[T]/aug-cc-pVQZ geometry:

|   |           |           |           |
|---|-----------|-----------|-----------|
| C | 0.000000  | 0.000000  | 0.000000  |
| F | 0.000000  | 0.000000  | 1.381670  |
| H | 1.028869  | 0.000000  | -0.350417 |
| H | -0.514434 | -0.891027 | -0.350416 |
| H | -0.514435 | 0.891026  | -0.350417 |

CH3CN CCSD[T]/aug-cc-pVQZ geometry:

|   |           |           |           |
|---|-----------|-----------|-----------|
| C | 0.000000  | 0.000000  | 0.000000  |
| C | 0.000000  | 0.000000  | 1.458513  |
| N | 0.000000  | 0.000000  | 2.614443  |
| H | 0.000000  | 1.021083  | -0.369268 |
| H | 0.884284  | -0.510542 | -0.369268 |
| H | -0.884284 | -0.510542 | -0.369268 |

CH3CHO CCSD[T]/aug-cc-pVQZ geometry:

|   |           |           |           |
|---|-----------|-----------|-----------|
| C | 0.000000  | 0.000000  | 0.000000  |
| C | 0.000000  | 0.000000  | 1.493631  |
| O | 0.966776  | 0.000000  | 2.169827  |
| H | -1.003217 | 0.000000  | 1.954314  |
| H | -0.538912 | -0.875276 | -0.361736 |
| H | -0.538912 | 0.875276  | -0.361736 |
| H | 1.013668  | 0.000000  | -0.385927 |

CF2H2 CCSD[T]/aug-cc-pVQZ geometry:

|   |           |           |           |
|---|-----------|-----------|-----------|
| C | 0.000000  | 0.000000  | 0.000000  |
| F | 0.000000  | 0.000000  | 1.353125  |
| F | 1.283765  | 0.000000  | -0.427661 |
| H | -0.484666 | -0.909444 | -0.346074 |
| H | -0.485857 | 0.906141  | -0.352997 |

CF4 CCSD[T]/aug-cc-pVQZ geometry:

|   |           |           |           |
|---|-----------|-----------|-----------|
| C | 0.000000  | 0.000000  | 0.000000  |
| F | 0.000000  | 0.000000  | 1.315134  |
| F | 1.239920  | 0.000000  | -0.438378 |
| F | -0.619960 | -1.073802 | -0.438378 |
| F | -0.619960 | 1.073802  | -0.438378 |

C6H6 CCSD/PCM/aug-cc-pVQZ geometry in benzene:

|   |           |          |           |
|---|-----------|----------|-----------|
| C | 0.000000  | 0.000000 | 0.000000  |
| C | 0.000000  | 0.000000 | 1.386066  |
| C | 1.200368  | 0.000000 | 2.079099  |
| C | 2.400736  | 0.000000 | 1.386066  |
| C | 2.400736  | 0.000000 | -0.000000 |
| C | 1.200368  | 0.000000 | -0.693033 |
| H | -0.933380 | 0.000000 | 1.924953  |
| H | 3.334117  | 0.000000 | -0.538887 |
| H | 3.334117  | 0.000000 | 1.924953  |
| H | 1.200368  | 0.000000 | -1.770808 |
| H | 1.200368  | 0.000000 | 3.156874  |
| H | -0.933380 | 0.000000 | -0.538887 |

C2H6 CCSD/PCM/aug-cc-pVQZ geometry in carbon tetrachloride:

|   |           |           |           |
|---|-----------|-----------|-----------|
| C | 0.000000  | 0.000000  | 0.761933  |
| C | 0.000000  | 0.000000  | -0.761933 |
| H | 0.000000  | 1.015469  | 1.155985  |
| H | -0.879422 | -0.507734 | 1.155985  |
| H | 0.879422  | -0.507734 | 1.155985  |
| H | 0.000000  | -1.015469 | -1.155985 |
| H | -0.879422 | 0.507734  | -1.155985 |
| H | 0.879422  | 0.507734  | -1.155985 |

C2H4 CCSD/PCM/aug-cc-pVQZ geometry in carbon tetrachloride:

|   |          |           |           |
|---|----------|-----------|-----------|
| C | 0.000000 | 0.000000  | 0.664597  |
| C | 0.000000 | 0.000000  | -0.664597 |
| H | 0.000000 | 0.921801  | 1.229229  |
| H | 0.000000 | -0.921801 | 1.229229  |
| H | 0.000000 | -0.921801 | -1.229229 |
| H | 0.000000 | 0.921801  | -1.229229 |
